# Supplementary figures and images for: Ribose-5-phosphate isomerase A overexpression promotes liver cancer development in transgenic zebrafish via activation of ERK and β-catenin pathways
Source: PubMed Central journal article supplement — Carcinogenesis. 2018 Nov 12;40(3):461–73. doi: 10.1093/carcin/bgy155 (PMC6514454; doi:10.1093/carcin/bgy155), 2018-11-12

Fig.S1

**A**

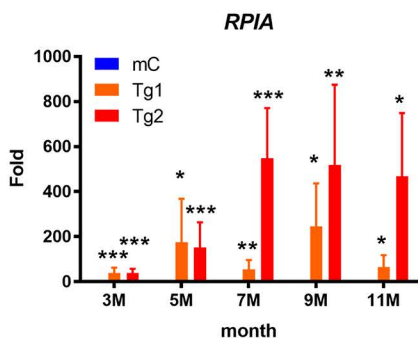

**B**

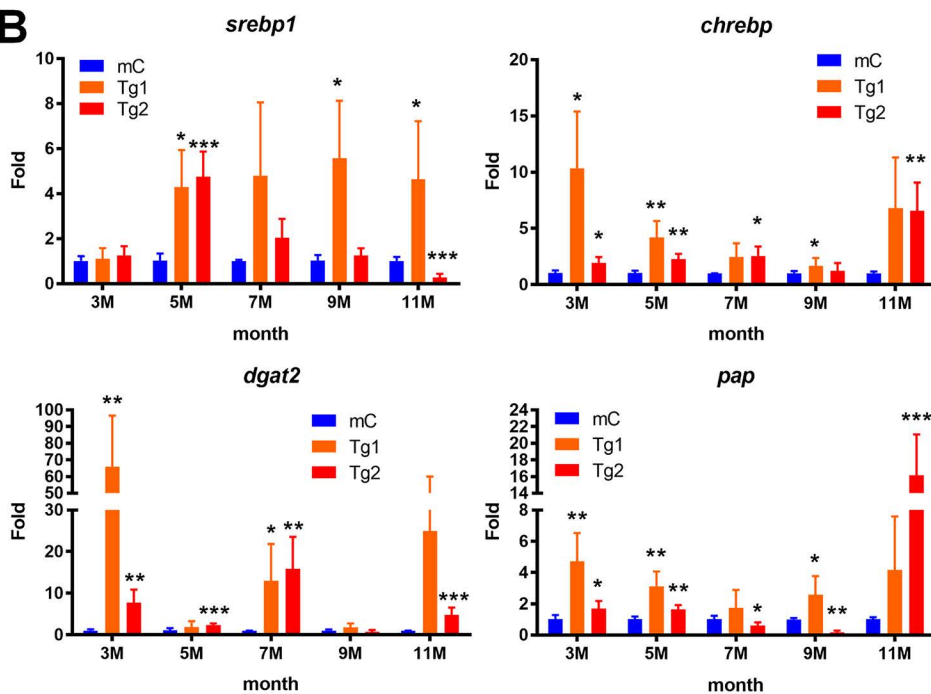

**C**

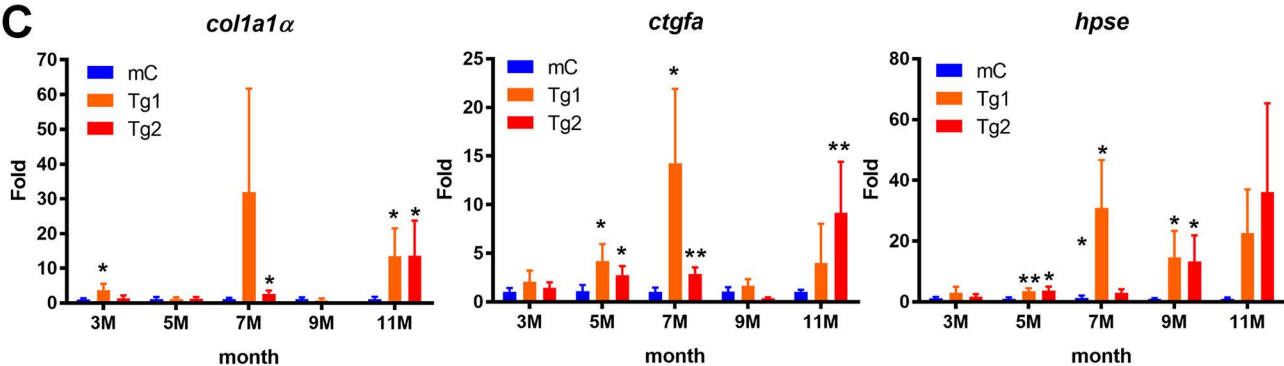

Fig.S2

# Transaldolase

**mC**

**Tg1**

**Tg2**

**3M**

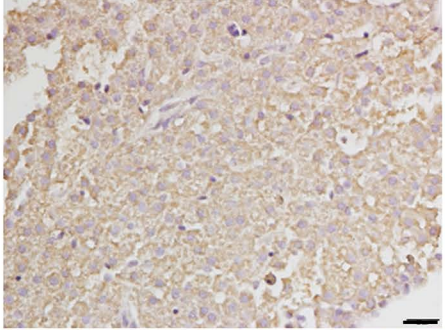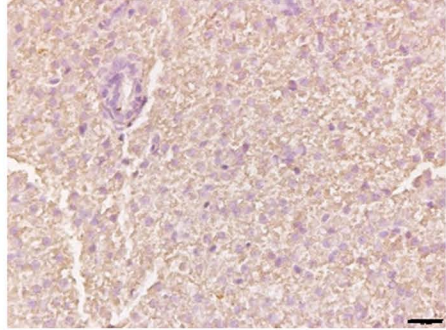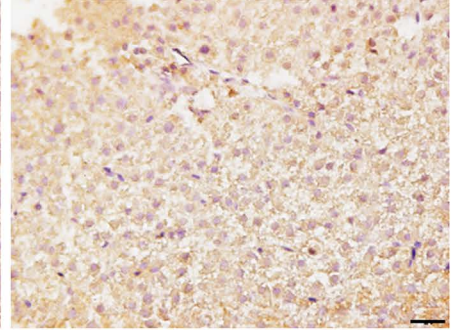

**5M**

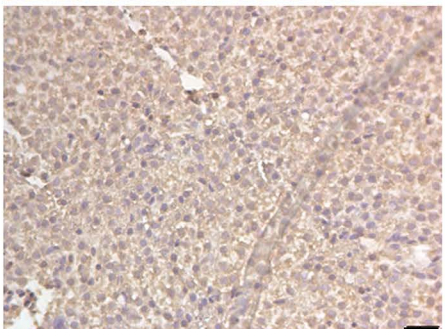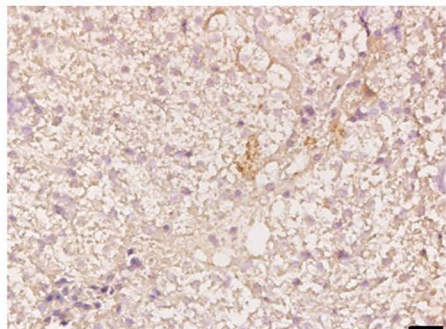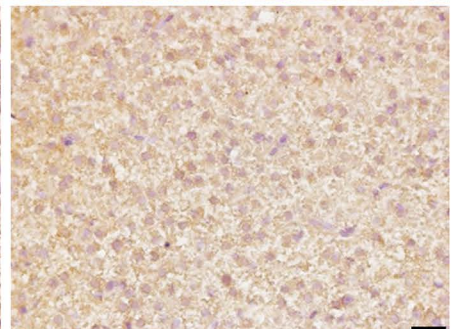

**7M**

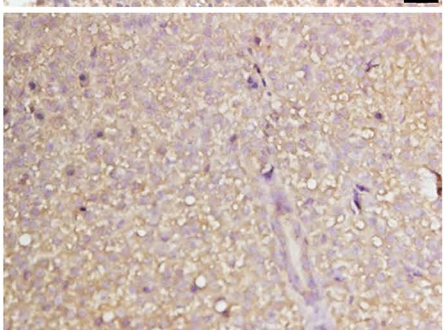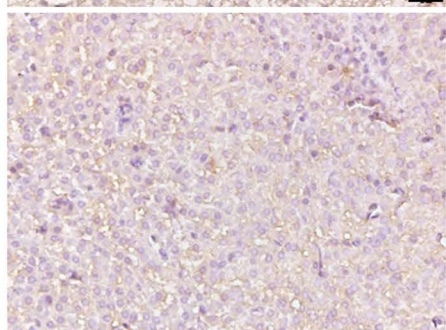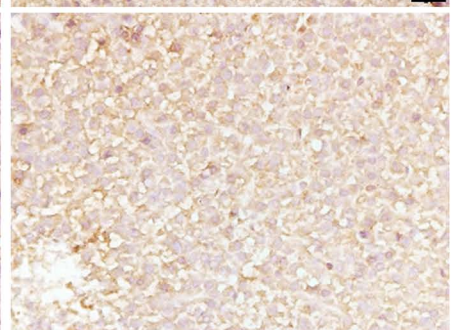

**9M**

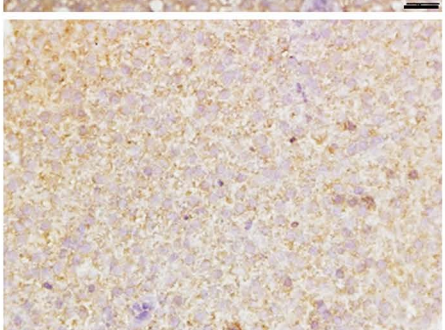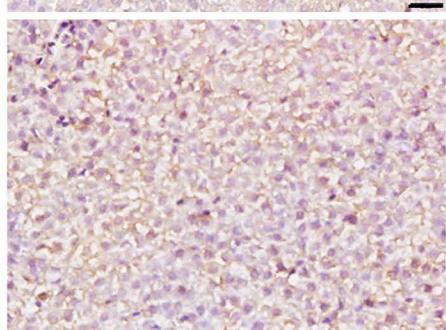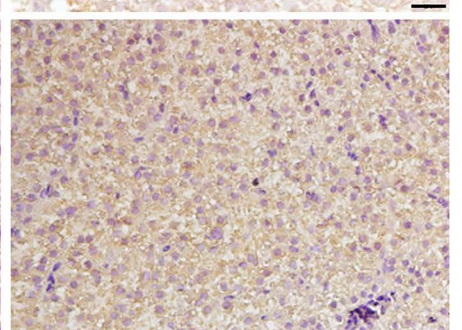

**11M**

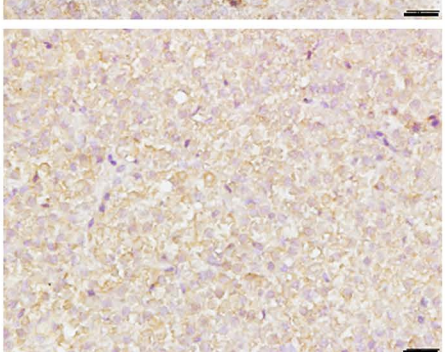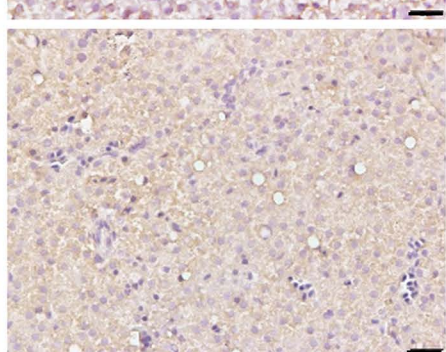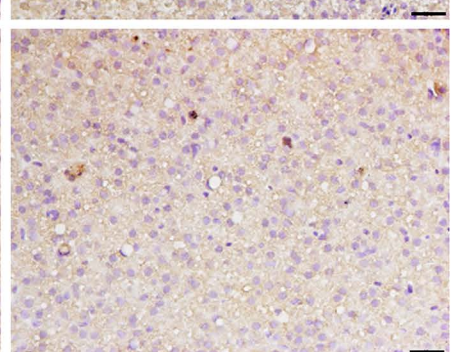

Figure S3

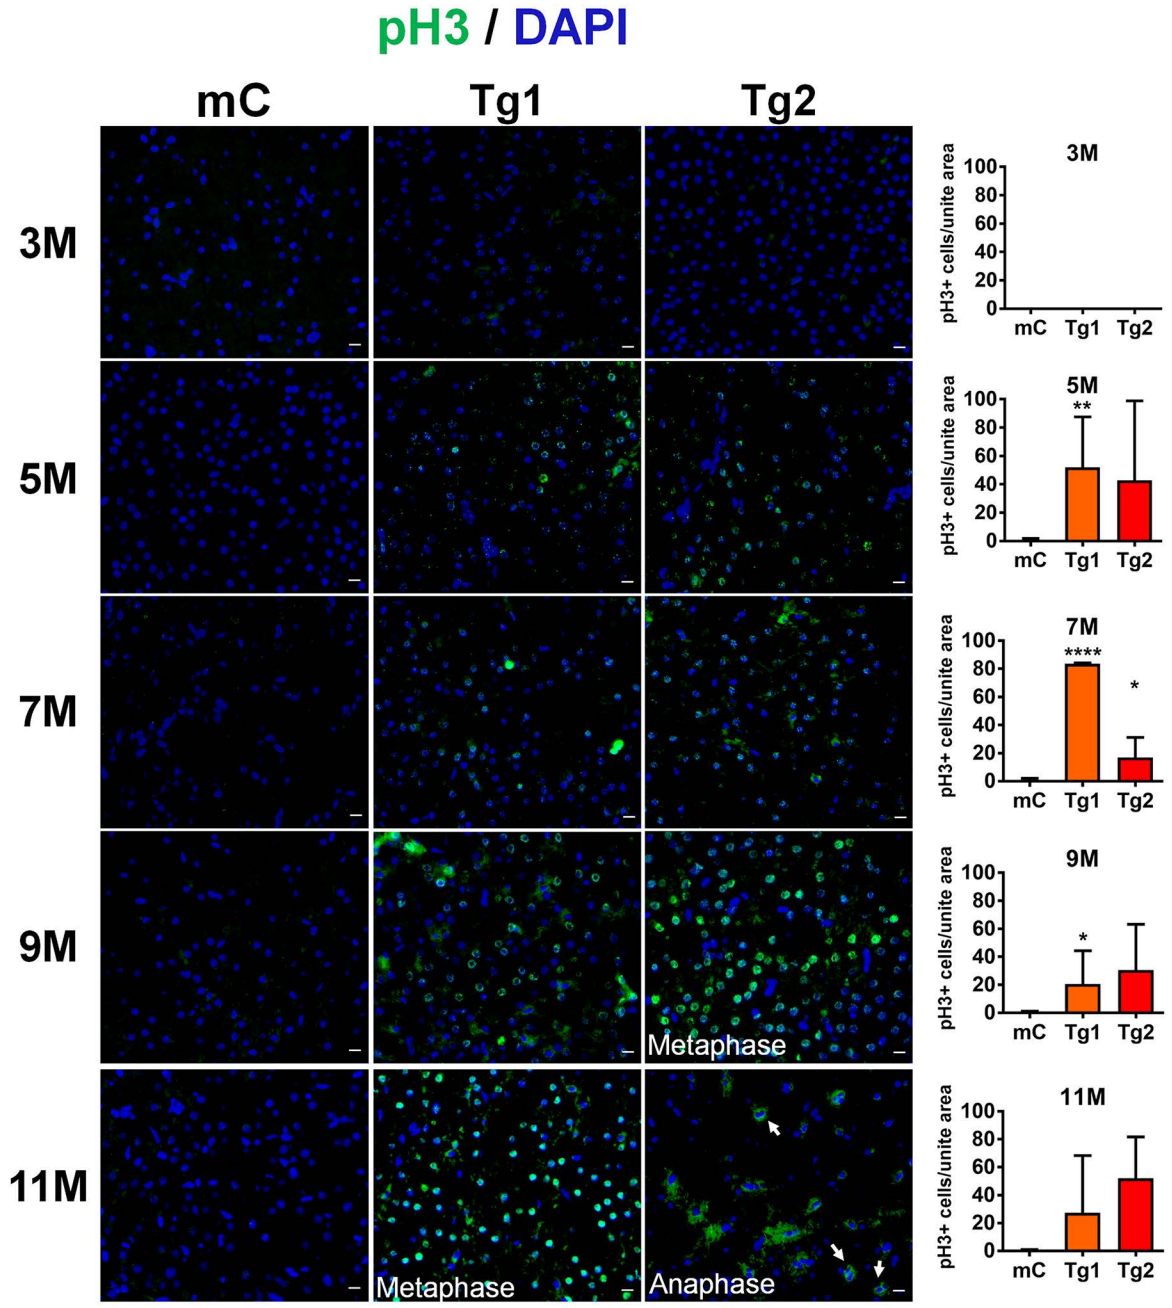



Fig.S5

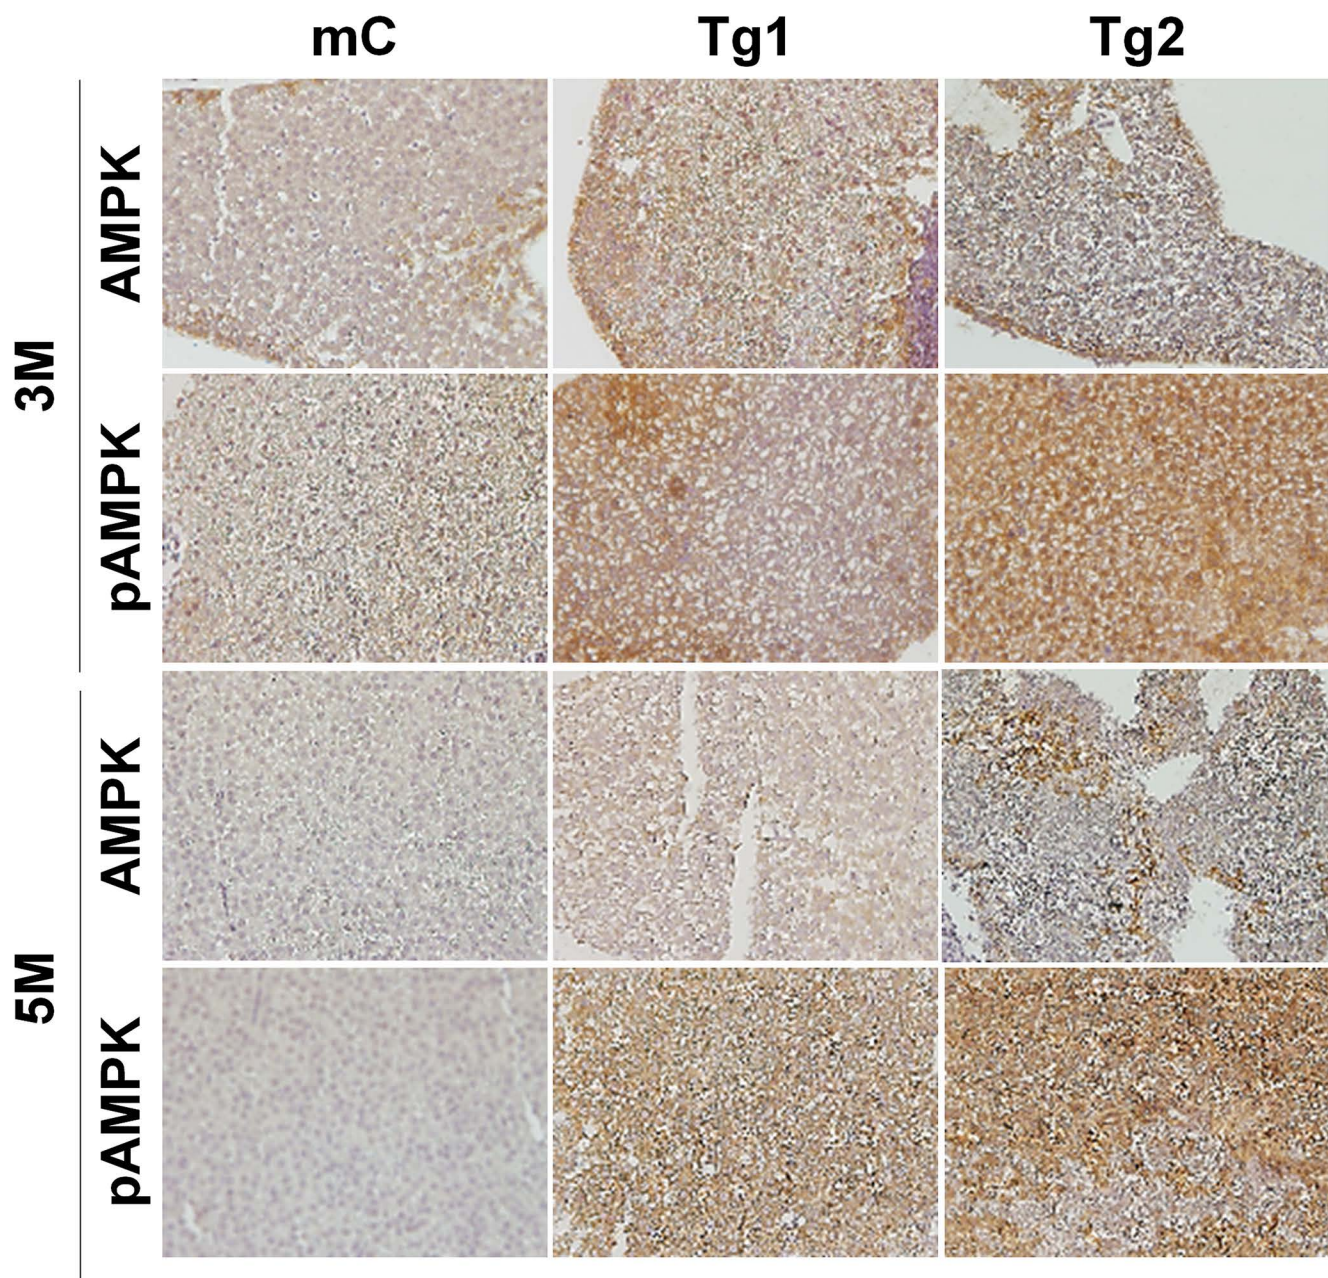

Fig.S6

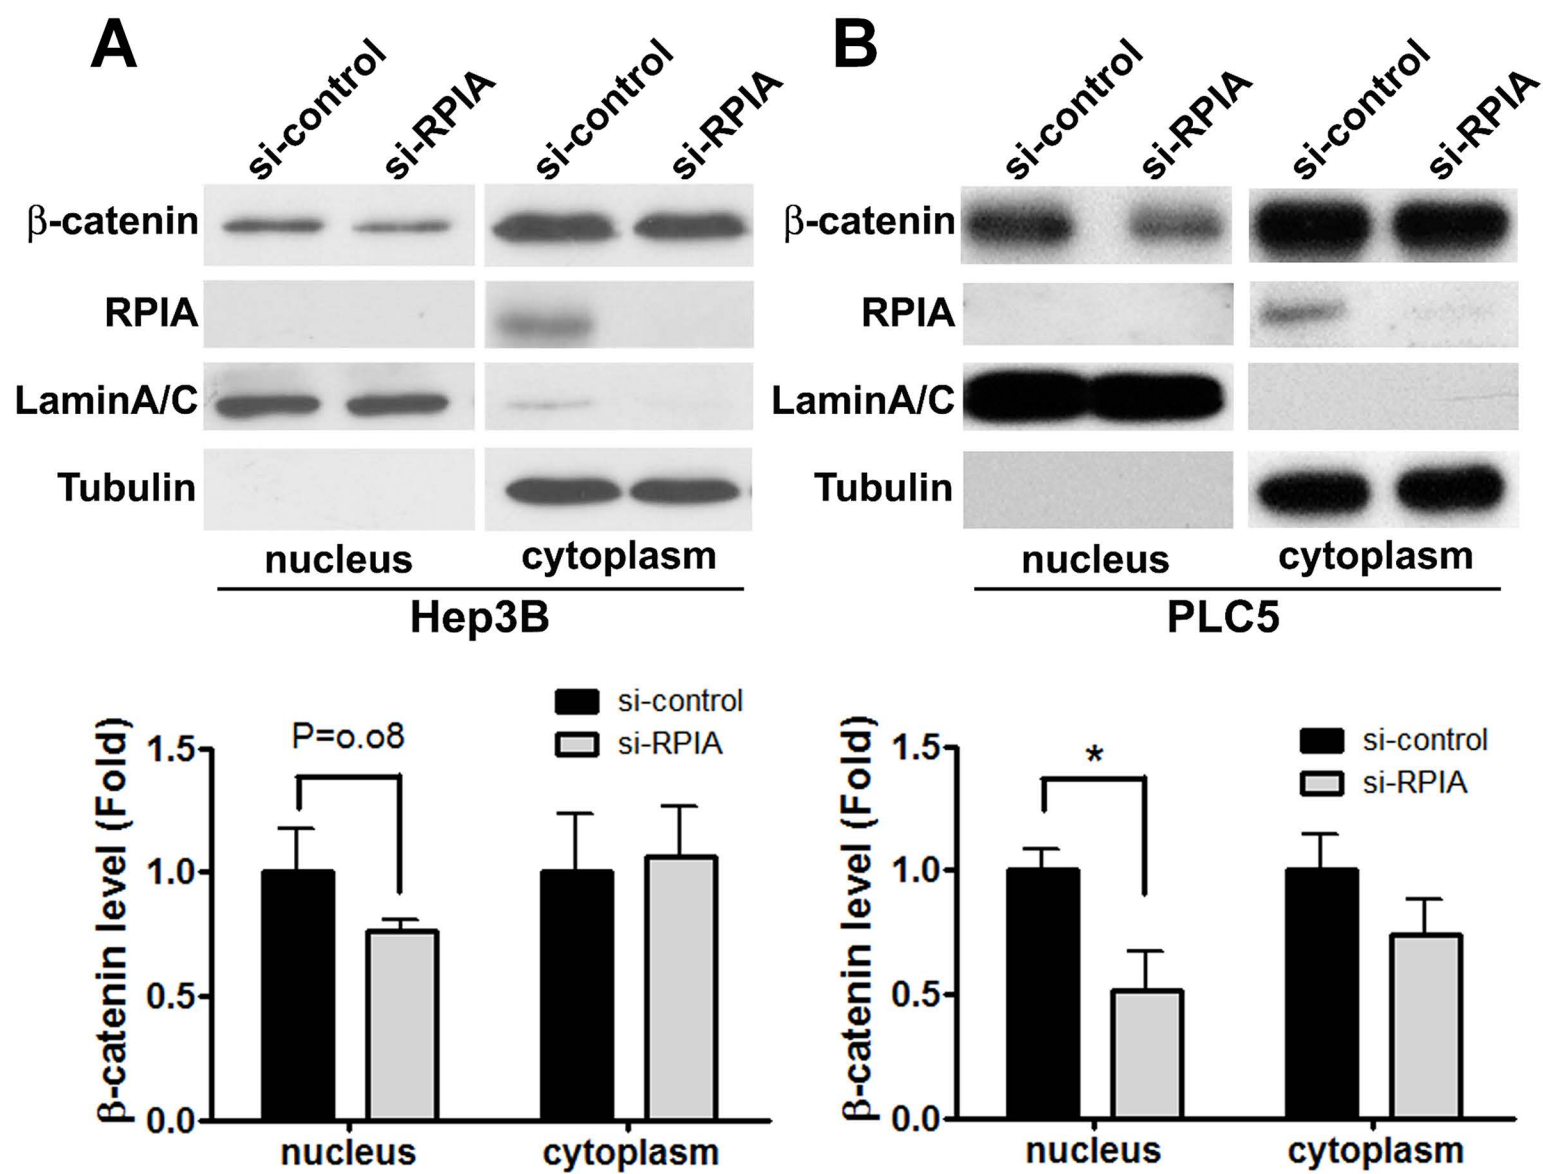

Supplement: bgy155_suppl_supplementary_figures_s1-s6.pdf [file bgy155_suppl_supplementary_figures_s1-s6.pdf]
